# Supplementary material
Source: PubMed Central journal article supplement (PMC3207412)
Supplement: supp_M111.301234_jbc.M111.301234-1.pdf [file supp_M111.301234_jbc.M111.301234-1.pdf]

## DNA binding by ZNF217

### SUPPLEMENTAL TABLES

Supplemental Table 1. Contribution of ZNF217-F67 amino acid residues to DNA binding. The table indicates the relative binding strength of each ZNF217-F67 mutant to the DNA consensus sequence TGCAGAAT, as assessed by EMSA (Figure 8). “++” indicates binding equivalent to wildtype ZNF217-F67, “+” indicates reduced binding and “-” indicates almost complete or total loss of detectable binding. Y506 was found not to fold correctly by NMR spectroscopy and has been omitted from the table.

| <b>ZNF217-F67<br/>mutated residue</b> | <b>Interaction</b> |
|---------------------------------------|--------------------|
| C473                                  | -                  |
| S474                                  | ++                 |
| Y475                                  | +                  |
| G477                                  | +                  |
| K478                                  | -                  |
| F479                                  | ++                 |
| R481                                  | -                  |
| S482                                  | -                  |
| Y484                                  | +                  |
| Y485                                  | -                  |
| L486                                  | ++                 |
| N487                                  | -                  |
| I488                                  | -                  |
| H489                                  | -                  |
| L490                                  | ++                 |
| R491                                  | -                  |
| T492                                  | +                  |
| T494                                  | -                  |
| G495                                  | -                  |
| E496                                  | -                  |
| K497                                  | -                  |
| P498                                  | -                  |
| Y499                                  | -                  |
| K500                                  | ++                 |
| E502                                  | ++                 |
| F503                                  | ++                 |
| C504                                  | -                  |
| E505                                  | +                  |
| A507                                  | ++                 |
| A509                                  | -                  |
| Q510                                  | -                  |
| K511                                  | -                  |
| T512                                  | -                  |
| S513                                  | +                  |
| Y516                                  | +                  |
| L518                                  | +                  |
| E519                                  | +                  |
| R520                                  | -                  |
